# Supplementary material
Source: HighWire-hosted journal article supplement (https://bmjopen.bmj.com/content/10/9/e033755)
Supplement: inline-supplementary-material-1 [file inline-supplementary-material-1.pdf]

**Annex A*****Economic burden***

A typical cost to a Singapore citizen for an episode of hyperkalemia would be as such in the year 2017. The cost for a Permanent Resident would be more.

| <b>Test</b>                                                                         | <b>Cost born by patient (SGD)</b> |
|-------------------------------------------------------------------------------------|-----------------------------------|
| Potassium, serum or K/Na/Cl, serum                                                  | 3.90                              |
| Creatinine, serum                                                                   | 2.75                              |
| Electrocardiogram                                                                   | 10.30                             |
| First doctor consult                                                                | 12.50                             |
| Sodium Polystyrene Sulfonate x 1 bottle<br>(optional and may/may not be prescribed) | 42.50                             |
| Second doctor consult                                                               | 12.50                             |
| <b>Total Cost for 1 patient with hyperkalemia</b>                                   | 84.45                             |
| <b>Total Cost for 1,362 patients with false hyperkalemia</b>                        | 115,020.90                        |

\*The prices for the blood tests and medications as well as consultations serve as a guide for consults in 2017, and does not reflect current prices.

Since 2017, the price of a doctor's consultation has increased to SGD 13.50 per consult, and the price of lab tests payable by patients has similarly inflated by about 10 percent. Most doctors will pair a repeat potassium with creatinine, unless creatinine was normal or stable to begin with for patients with existing chronic kidney disease.
